# Supplementary material
Source: MDPI journal article supplement (https://www.mdpi.com/1999-4907/14/7/1334)
Supplement: s1 [file s1]

**Supplementary Materials:**

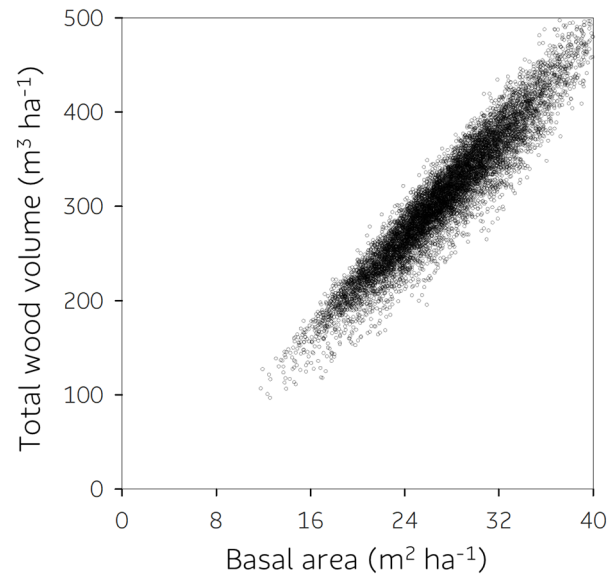

**Figure S1.** Relationship between basal area and total wood volume (class centre of 6-years-old) for the 9953 forest inventory plots of *Eucalyptus* plantations used in this study.

**Table S1.** Coefficients of the monthly and annual air temperatures models and statistical indices. Missing values of coefficients were not significant at 5%.

| Month     | Coefficients of the Multivariate Regression Equation |                           |                                      |           |                                                       |            |                  |                        |                                        |             | Statistics  |            |
|-----------|------------------------------------------------------|---------------------------|--------------------------------------|-----------|-------------------------------------------------------|------------|------------------|------------------------|----------------------------------------|-------------|-------------|------------|
|           | $a0$<br>°C                                           | $h$<br>°C m <sup>-1</sup> | $\varphi$<br>°C degree <sup>-1</sup> | $\lambda$ | $h\varphi$<br>°C m <sup>-1</sup> degree <sup>-1</sup> | $h\lambda$ | $\varphi\lambda$ | $h^2$                  | $\varphi^2$<br>°C degree <sup>-2</sup> | $\lambda^2$ | $R^2_{adj}$ | $p$ -value |
| January   | 39.653                                               | -0.0140                   | 0.666                                | -0.0448   | -4.12×10 <sup>-4</sup>                                | -          | -                | -4.27×10 <sup>-7</sup> | -                                      | -           | 0.92        | <0.001     |
| February  | 42.141                                               | -0.0157                   | 0.701                                | -0.0128   | -4.95×10 <sup>-4</sup>                                | -          | -                | -7.15×10 <sup>-7</sup> | -                                      | -           | 0.91        | <0.001     |
| March     | 43.024                                               | -0.0169                   | 0.855                                | -0.0556   | -5.39×10 <sup>-4</sup>                                | -          | -                | -6.02×10 <sup>-7</sup> | -                                      | -           | 0.91        | <0.001     |
| April     | 41.421                                               | -0.0141                   | 0.916                                | -0.0858   | -4.25×10 <sup>-4</sup>                                | -          | -                | -7.38×10 <sup>-7</sup> | -                                      | -           | 0.91        | <0.001     |
| May       | 35.315                                               | -0.0079                   | 0.782                                | -0.0831   | -1.58×10 <sup>-4</sup>                                | -          | -                | -5.74×10 <sup>-7</sup> | -                                      | -           | 0.86        | <0.001     |
| June      | 36.236                                               | -0.0114                   | 1.013                                | -0.1550   | -3.12×10 <sup>-4</sup>                                | -          | -                | -4.86×10 <sup>-7</sup> | -                                      | -           | 0.84        | <0.001     |
| July      | 35.504                                               | -0.0095                   | 1.102                                | -0.2070   | -2.40×10 <sup>-4</sup>                                | -          | -                | -6.52×10 <sup>-7</sup> | -                                      | -           | 0.84        | <0.001     |
| August    | 41.087                                               | -0.0127                   | 1.402                                | -0.2610   | -3.97×10 <sup>-4</sup>                                | -          | -                | -9.05×10 <sup>-7</sup> | -                                      | -           | 0.87        | <0.001     |
| September | 47.712                                               | -0.0112                   | 1.556                                | -0.2230   | -3.49×10 <sup>-4</sup>                                | -          | -                | -1.02×10 <sup>-6</sup> | -                                      | -           | 0.91        | <0.001     |
| October   | 50.746                                               | -0.0144                   | 1.537                                | -0.1840   | -4.78×10 <sup>-4</sup>                                | -          | -                | -9.88×10 <sup>-7</sup> | -                                      | -           | 0.92        | <0.001     |
| November  | 45.088                                               | -0.0169                   | 1.260                                | -0.1820   | 5.62×10 <sup>-4</sup>                                 | -          | -                | -7.25×10 <sup>-7</sup> | -                                      | -           | 0.91        | <0.001     |
| December  | 44.884                                               | -0.0198                   | 0.996                                | -0.0859   | -6.75×10 <sup>-4</sup>                                | -          | -                | -6.28×10 <sup>-7</sup> | -                                      | -           | 0.91        | <0.001     |
| Annual    | 41.909                                               | -0.0137                   | 1.066                                | -0.1320   | -4.20×10 <sup>-4</sup>                                | -          | -                | -7.06×10 <sup>-7</sup> | -                                      | -           | 0.90        | <0.001     |

$a0$  = intercept of multivariate regression equation;  $h$  = altitude in meters;  $\varphi$  = latitude, in decimal degrees (negative in the southern hemisphere);  $\lambda$  = longitude, in decimal degrees (negative values for west of Greenwich meridian);  $R^2_{adj}$  = adjusted coefficient of determination.

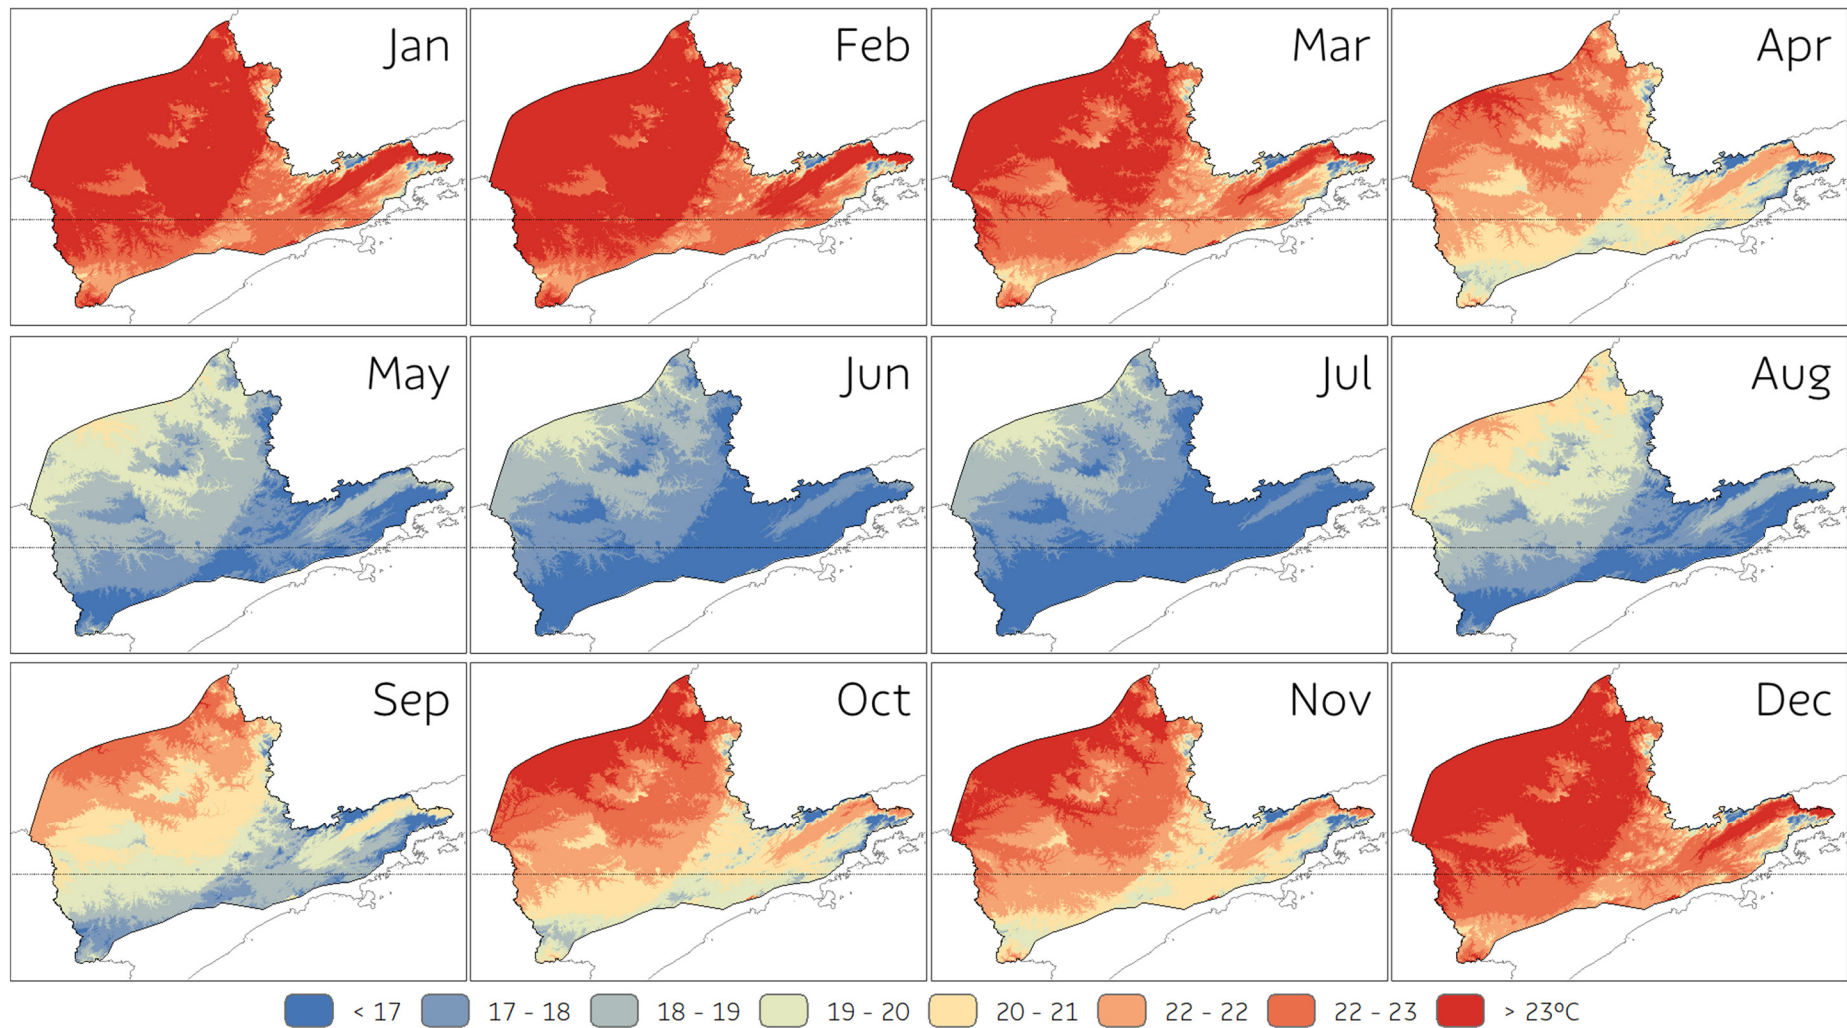

**Figure S2.** Average monthly temperature (°C) obtained by multivariate nonlinear regression model based on a network of 48 meteorological stations distributed on the study area. These air temperature maps were used to calculate the monthly potential evapotranspiration by method of Thornthwaite [51].

5  
6  
7  
8

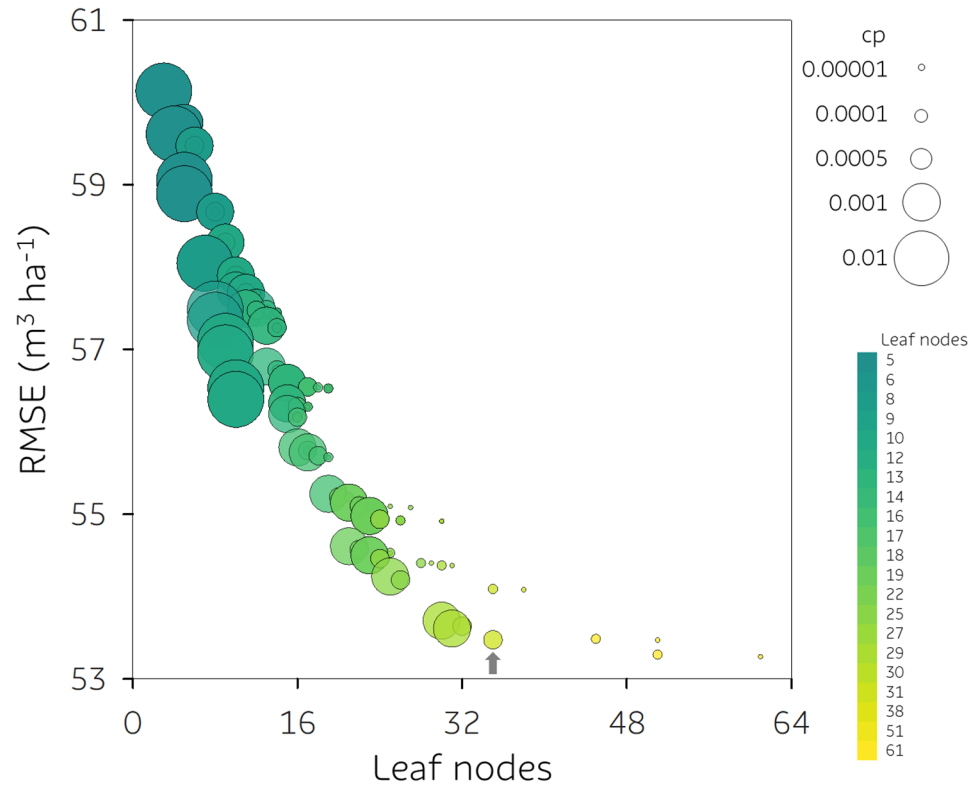

**Figure S3.** Relationship between RMSE (root mean squared error) and leaf (terminal) nodes for the 450 decision tree models obtained by tuning hyperparameters such as minsplit, minbucket, and cost-complexity factor (cp). Circle size represent the five cp factor (rpart) used in the tuning modeling. Color ramp denote the number of leaf nodes found in the complete (minsplit  $\times$  minbucket  $\times$  cp) model tuning. Decision tree setup selected has the following hyperparameters minbucket = 79, minsplit = 158, and cp = 0.0005, for a leaf node = 35, and RMSE = 53.5 m³ ha<sup>-1</sup> (see the gray arrow on the plot indicating the rpart hyperparameters setup selected).

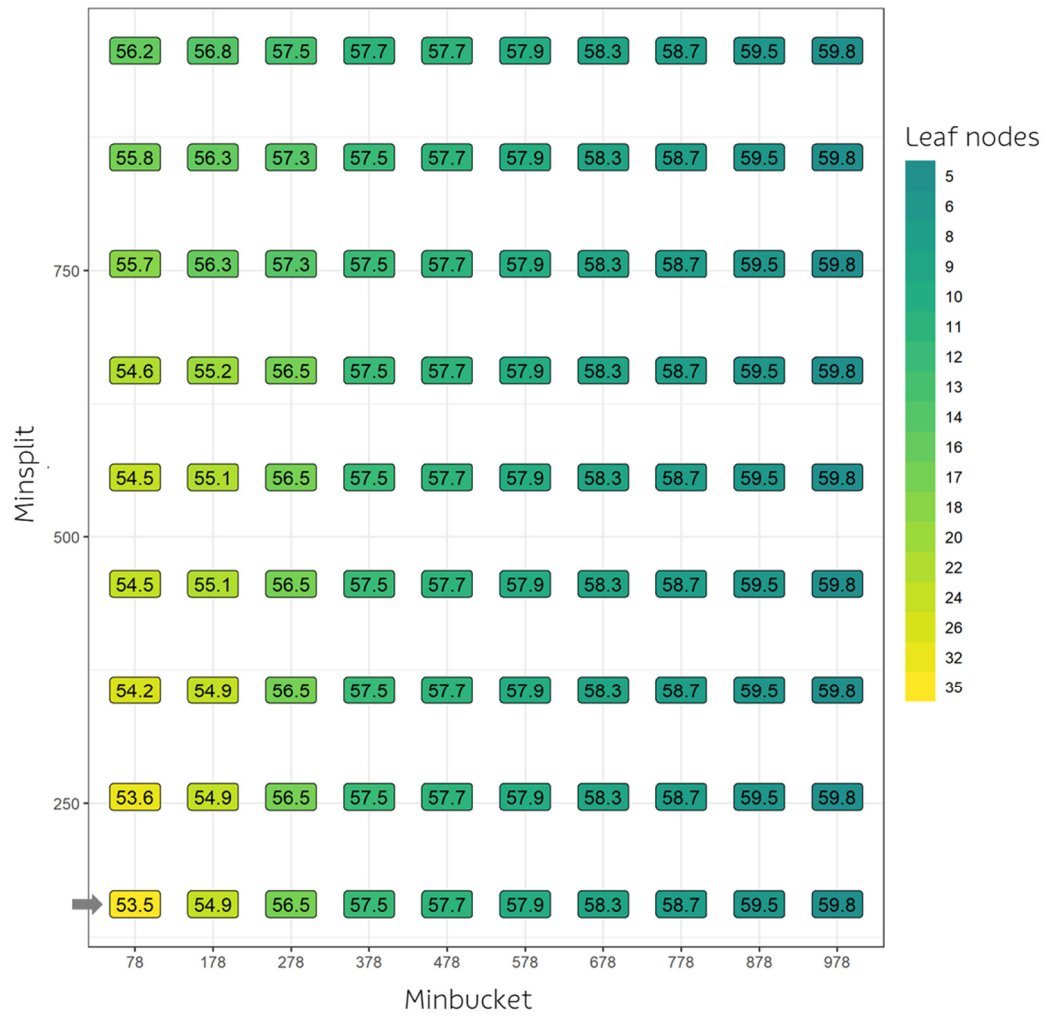

**Figure S4.** RMSE (root mean squared error) visualization of the decision tree modelling by tuning hyperparameters such as minsplit and minbucket, and for the complexity parameter = 0.0005. Color ramp denote the number of leaf nodes found in the model tuning. The rpart setup selected for the *Eucalyptus* forest zones productivity zoning has minbucket = 79, minsplit = 158, cp = 0.0005, resulting in 35 leaf nodes, and RMSE of 53.5 m<sup>3</sup> ha<sup>-1</sup> (see the gray arrow on the plot indicating the rpart hyperparameters setup selected).
